# Supplementary material
Source: Springer Nature journal article supplement (https://www.springermedizin.de/resource/supplementary/12916_2006_103_MOESM5_ESM.pdf/9599212)
Supplement: MOESM5 [file 9599212]

**Table 2 - Associations between the effect moderators and (i) fat in lumbar multifidus muscles and (ii) LBP variables expressed as odds ratios with 95% confidence intervals (OR (95% CI)).**

| Variables                       | Adults        |               |               | Adolescents   |               |               |
|---------------------------------|---------------|---------------|---------------|---------------|---------------|---------------|
|                                 | Fat LMM       | LBP year      | LBP ever      | Fat LMM       | LBP month     | LBP year      |
| Sex                             | 3.7 (2.1–6.3) | 0.9 (0.6–1.5) | 1.1 (0.6–1.7) | 3.7 (1.9–7.1) | 1.5 (1.0–2.4) | 1.6 (1.1–2.4) |
| Body weight                     | 0.9 (0.6–1.2) | 1.2 (0.9–1.6) | 1.3 (0.9–2.0) | 0.6 (0.3–1.4) | 1.5 (1.0–2.4) | 1.4 (0.9–2.2) |
| Workload                        | 0.9 (0.7–1.1) | 1.1 (0.9–1.4) | 1.2 (0.9–1.6) | —             | —             | —             |
| Physical activity               | 0.8 (0.6–1.2) | 0.9 (0.7–1.2) | 1.0 (0.7–1.5) | —             | —             | —             |
| Weekly hours of sports activity | 1.0 (0.8–1.3) | 1.1 (0.9–1.3) | 1.2 (0.9–1.5) | 0.9 (0.8–1.1) | 1.0 (0.9–1.1) | 1.0 (1.0–1.1) |
| Daily bicycling                 | —             | —             | —             | 0.6 (0.3–1.3) | 1.1 (0.6–2.1) | 1.5 (0.9–2.6) |

Data are expressed as odds ratios (95% confidence intervals).

The estimates denote the OR for each step in those categorical variables that take >2 values.

Fat LMM, fat in lumbar multifidus muscles; LBP, lower back pain; LBP ever, had ever experienced lower back pain; LBP month, had experienced back pain in previous month; LBP year, had experienced back pain in previous year.
